# Supplementary material for: Effects of the probioticBacillus coagulansBC69 on the metabolic and histological alterations induced by a high-sugar and high-fat diet in C57BL/6J mice
Source: Royal Society of Chemistry journal article supplement (doi:10.1039/d3fo01104f), 2023-01-01
Supplement: d3fo01104f1.xlsx [file d3fo01104f1.xlsx]

## Sheet: Sheet1
	bodyweight gain (g)	FBG (mmol/L)	OGTT	Liver weight (g)	Epididymal fat (g)	perirenal fat (g)	TC (mmol/L)	LDLC (mmol/L)	HDLC (mmol/L)	TNF-α (ng/L)	IL-6 (ng/L)	Acetic acid (μmol/g)	Pentanoic acid (μmol/g)	Butyric acid (μmol/g)	SCFAs (μmol/g)
ND_1	3.5	4.4	996	0.88	0.42	0.05	3.07479	0.518471	3.03545	94.6765	53.7775	134.169	11.6515	9.05856	154.879
ND_3	4.3	4.7	1114.5	0.8	0.37	0.08	2.80268	0.364331	2.7	89.1133	44.5502	119.856	4.69271	8.61547	133.165
ND_5	2.9	4.1	999.75	0.71	0.4	0.08	2.80268	0.56051	3.11182	88.0119	48.6559	165.049	8.96524	7.97566	181.99
HFHS_1	6.3	6.8	1487.25	1.2	0.92	0.33	5.60537	0.854777	2.99727	104.284	57.428	136.001	4.53919	28.5143	169.054
HFHS_3	8.9	7	1488.75	1.2	0.86	0.31	6.06795	0.798726	2.06182	110.133	63.0189	66.9932	4.85033	3.6062	75.4497
HFHS_6	9.7	6.3	1555.5	1.06	1.01	0.34	5.79584	0.952866	3.28364	109.122	52.8792	72.408	7.96578	5.44078	85.8145
HFHS_BC69_1_1	3.7	6.5	1338	0.96	0.85	0.21	5.41489	0.840764	3.01445	95.8008	69.8523	115.443	14.4287	7.71462	137.586
HFHS_BC69_1_3	8.1	5.9	1405.5	1.14	1.02	0.33	5.52374	0.882803	3.03545	90.2184	53.1994	78.0082	12.9393	9.12224	100.07
HFHS_BC69_1_8	8	6.4	1320	1.25	0.69	0.47	5.85026	0.910828	3.11564	92.646	57.494	101.068	11.4994	9.33246	121.9
HFHS_BC69_2_3	6.9	7.3	1290	1.12	0.94	0.24	5.41489	0.770701	3.17291	113.701	62.2649	95.1209	14.3366	3.66104	113.119
HFHS_BC69_2_4	9.3	7.1	1459.5	1.11	0.9	0.34	5.85026	0.952866	2.69182	117.315	61.9235	93.5335	10.9897	6.14436	110.668
HFHS_BC69_2_5	9.7	7.4	1439.25	1.2	0.96	0.34	5.74142	0.756688	2.67273	113.53	61.447	77.9835	8.93133	4.2864	91.2012

## Sheet: Sheet2
	ND_1	ND_3	ND_5	HFHS_1	HFHS_3	HFHS_BC69_2_5	HFHS_BC69_1_1	HFHS_BC69_1_3	HFHS_6	HFHS_BC69_2_3	HFHS_BC69_2_4	HFHS_BC69_1_8
Acinetobacter	0.000354465	0.000147834	4.62759e-05	2.19669e-05	2.17576e-05	0	0.0113725	2.33907e-05	0	0	2.13484e-05	0
Allobaculum	0.00223586	0.00677573	0.0479882	0.128792	0.000174061	0.112527	0.213198	0.268151	0.162248	0.165256	0.391166	0.0398621
Alloprevotella	0.00163599	0.0107919	4.62759e-05	0.000373438	4.35152e-05	0	0.00263569	0.000163735	0.00286415	0.000559793	0.000170787	0.000910885
Anaeroplasma	0.00062713	0.0119746	2.3138e-05	0.00114228	2.17576e-05	0	0	0	0.00148936	0	0	4.33755e-05
Anaerotruncus	0.000981595	0.00118267	0.00282283	0.0335874	0.0200387	0.0021901	0.000170832	0.0226656	0.00126023	0.0110326	0.00166517	0.0132512
Bifidobacterium	0.00398091	0.0268812	0.0464379	0.00782022	0.00524358	0.034735	0.0359723	0.00720434	0.0297413	0.012572	0.0162675	0.00887029
Blautia	0.000109066	0.00024639	0.000786691	0.000439338	0.00130546	0.00247481	0.000170832	0.00290045	0.000160392	0.00174935	0.000149439	0.0560628
Candidatus_Saccharimonas	0.0286026	0.0337801	0.0174692	0.00224063	0.00450382	0.0111257	0.00632077	0.00516935	0.00309328	0.000629767	0.00224158	0.00360016
Clostridium_sensu_stricto_1	5.45331e-05	0	2.3138e-05	0.00112031	6.52727e-05	0.0155497	0.00763862	0.0114381	0.00105401	0.0078371	0.0269416	0.00130126
Colidextribacter	0.00569871	0.00187257	0.000740415	0.00182325	0.00113139	0.00516864	0.000829754	0.00360217	0.00307037	0.0135517	0.00164382	0.0017784
Coriobacteriaceae_UCG-002	0.00103613	0.00273493	0.000509035	0.0619687	0.0132068	0.00508103	0.140375	0.00444424	0.021905	0.0151144	0.0697238	0.00507493
Desulfovibrio	0.0808453	0.0530478	0.114232	0.00962151	0.017319	0.0675865	0.00849278	0.0398812	0.0169558	0.0962611	0.0135135	0.0501854
Dubosiella	0.0258214	0.0711575	0.00974109	0.111109	0.0957333	0.0657687	0.0221837	0.0093329	0.0504777	0.02701	0.0433799	0.0554772
Enterococcus	0.000136333	4.92781e-05	0.00011569	0.000109835	2.17576e-05	0	0.0942747	0.0726516	0.000595743	0.0151611	0.0117203	2.16877e-05
Enterorhabdus	0.016878	0.0141428	0.011407	0.011291	0.0132068	0.0104687	0.0144475	0.00212855	0.0120982	0.00317216	0.00418428	0.00997636
Eubacterium_brachy_group	0.00278119	0.000197112	0.00150397	0.00353667	0.00522182	0.00639509	0.000122023	0.0149467	0.000412437	0.00555128	0.00407754	0.00329654
Eubacterium_coprostanoligenes_group	0.000354465	0.000271029	0.00203614	0.00360257	0.00163182	0.0107753	0.00151308	0.00173091	0.00866118	0.00527138	0.000704496	0.00327485
Eubacterium_xylanophilum_group	0.0105794	0.00463214	0.0123325	0.00307537	0.000826788	0.00116075	0.00207439	0.00383608	0.00100818	0.0169804	0.0130225	0.00225552
Faecalibaculum	0.00231766	0.0080816	0.00192045	0.00186719	0.000979091	0.0747043	0.014838	0.0106428	0.0303141	0.000816365	0.00181461	0.0201045
Helicobacter	0.0145331	0.00110876	0.00421111	0.00412978	0.0708644	0.018594	0.0021476	0.00886508	0.00339115	0.000466494	0.00104607	0.051812
Ileibacterium	0.0922699	0.218228	0.107661	0.222173	0.323796	0.27707	0.149209	0.121936	0.199299	0.0929723	0.22894	0.0621137
Jeotgalicoccus	0.0290389	0	0.000856105	0.000131802	6.52727e-05	4.3802e-05	0.000317259	0.000210516	0.000274958	0.000139948	0.000106742	0.000520506
Lachnoclostridium	0.0948603	0.0127384	0.00583077	0.0234167	0.0173408	0.0155497	0.00871242	0.0183851	0.0117774	0.0236279	0.0105034	0.0111909
Lachnospiraceae_NK4A136_group	0.0289025	0.0441039	0.0477105	0.141818	0.0835491	0.0731494	0.00207439	0.0597399	0.0269459	0.273086	0.0557406	0.0579063
Lachnospiraceae_UCG-006	0.00133606	0.00024639	0.0110368	0.000680974	0.00187115	0.00118265	9.76181e-05	0.00102919	0.000229132	0.00235579	0.0032663	0.00275434
Lactobacillus	0.0537423	0.221382	0.371758	0.00114228	0.00189291	0.000788436	0.0169123	0.00283028	0.0156955	0.00347538	0.00527305	0.00242903
Mucispirillum	0.00207226	0.00261174	2.3138e-05	0.00120818	0.00809382	0.00227771	0.000219641	0.0175196	0.000481177	0.000303221	0.000982025	0.000368692
Muribaculum	0.00479891	0.00162618	0.000323932	0.00248226	0.0015883	0.000525624	0.00834635	0.0075552	0.0215155	0.000326546	0.000277529	0.00203865
norank_f__Desulfovibrionaceae	0.00321745	0.00529739	0.00023138	0.0330382	0.0171667	0.0104687	0.00558864	0.00556699	0.00515547	0.0258204	0.00599889	0.0611594
norank_f__Lachnospiraceae	0.0139059	0.00266102	0.00511349	0.0160139	0.0141642	0.0182654	0.00114701	0.016584	0.00497216	0.0634199	0.00369327	0.103819
norank_f__Muribaculaceae	0.166517	0.125363	0.045119	0.0672627	0.163443	0.0346255	0.160191	0.140344	0.261806	0.0208056	0.0170573	0.166258
norank_f__norank_o__Clostridia_UCG-014	0.0110975	0.0067511	0.00404914	0.00300947	0.00317661	0.00381078	0.00436841	0.0032747	0.00185597	0.000699741	0.00510226	0.000260253
norank_f__Oscillospiraceae	0.0829993	0.0259695	0.00178162	0.00173539	0.00224103	0.00510294	0.000317259	0.00633888	0.000710309	0.00930656	0.00177191	0.00201696
Parasutterella	0.000245399	0.000468142	0.000161966	0.00226259	0.00587455	0.000459921	0.00561304	0.00280689	0.012396	0.000349871	0.00162248	0.00156152
Prevotellaceae_NK3B31_group	0.0173415	0.000123195	4.62759e-05	0.000219669	0.000674485	0	0.000146427	0	0.00313911	9.32988e-05	4.26967e-05	0
Romboutsia	0.00910702	0.00859902	0.000323932	0.00386618	0.0150998	0	0.000854159	0.00140344	0.00050409	0.00401185	0.0026472	0.00290616
Turicibacter	0.0671575	0.0108412	0.0288993	0.0190234	0.0171885	0.0125931	0.00195236	0.0159291	0.0164975	0.012502	0.0100978	0.0335726
unclassified_f__Erysipelotrichaceae	0.00070893	0.00300596	0.00143455	0.00213079	0.002872	0.0164477	0.00026845	0.00533308	0.000801961	0.00569123	0.0084326	0.00468455
unclassified_f__Lachnospiraceae	0.0407362	0.00480461	0.0196441	0.0267337	0.0179282	0.0312308	0.00219641	0.0233673	0.00646152	0.0196161	0.00830451	0.119738
